# Supplementary material for: Sublethal Effects of Imidacloprid on Fecundity, Apoptosis and Virus Transmission in the Small Brown Planthopper Laodelphax striatellus
Source: MDPI journal article supplement (doi:10.3390/insects12121131), 2021-12-17
Supplement: s1 [file s1]

Table S1. Primers used for qRT-PCR.

| Primer name  | Primer Sequence (5'-3') |
|--------------|-------------------------|
| Vg-F         | CAACATTCTGCCCCAATCCG    |
| Vg-R         | TTGGCAGCTCATCAACATCGT   |
| VgR-F        | TCACGGAAATCAGCGTCTCTAT  |
| VgR-R        | AGGATGAACTAAGGCGTGCTC   |
| caspase-Nc-F | TAATGAGTCACGGCGGAATA    |
| caspase-Nc-R | GCTTGCCCTGCAAGTGTT      |
| caspase-8-F  | GAAGAGGAACAACGAACAAGG   |
| caspase-8-R  | TGGACAGCTAAGTTGGAGGG    |
| caspase-1a-F | CATGCCAAGGAGACAAACTAGA  |
| caspase-1a-R | CGCCACGAATAGAAACCAG     |
| caspase-1c-F | TGCGTCCAGCGTTGAGAT      |
| caspase-1c-R | CCATTGTGGCAGTAGTCGGT    |
| CP-F         | CGCTGGCTGGTATGTCTGTC    |
| CP-R         | CCGCTGACTTCTGTTGCTGT    |
| RNA3-F       | GCCCCAAAACCACACAGACAAA  |
| RNA3-R       | CAGTAGTTGTGGGGGGTCTCAT  |
| actin-F      | GCGAGAAATCGTCCGAGACAT   |
| actin-R      | AACTGGAGGAGGCGGCTGT     |
